# Supplementary material
Source: ML conference proceedings conference paper supplement (https://proceedings.neurips.cc/paper_files/paper/2023/hash/264f2e10479c9370972847e96107db7f-Abstract.html)
Supplement: Supplementary file 1 [file 264f2e10479c9370972847e96107db7f-Supplemental-Conference.zip]

Archive with 2 entries (2 files):
- supplement_crv/implementation.zip
- supplement_crv/paper_and_supplement.pdf
